# Supplementary material for: A Natural Language Processing System That Links Medical Terms in Electronic Health Record Notes to Lay Definitions: System Development Using Physician Reviews
Source: PubMed Central journal article supplement (PMC5799720; doi:10.2196/jmir.8669), 2018-01-22
Supplement: jmir_v20i1e26_app1.pdf [file jmir_v20i1e26_app1.pdf]

## Multimedia Appendix 1. Criteria used for manual selection of terms important for patient comprehension of electronic health record notes

Table A1-1. Criteria for judging the importance of candidate terms extracted from *EHR-Pittsburgh*<sup>a</sup>. Positive examples refer to the medical terms important for patient EHR comprehension and negative examples refer to the other terms.

| Criteria                        | Description                                                                              | Positive examples                                                                              | Negative Examples                                                                                     |
|---------------------------------|------------------------------------------------------------------------------------------|------------------------------------------------------------------------------------------------|-------------------------------------------------------------------------------------------------------|
| <b>unithood</b>                 | It is a valid term                                                                       | adrenal insufficiency, iron deficiency anemia, white blood count, VQ scan, femoral nerve block | mouth daily, procedure performed, deficiency anemia, four hour, doctor wash incision                  |
| <b>termhood</b>                 | It is a medical term with clear clinical meaning(s) in its standalone form               | ACE inhibitor, heart failure, bronchoscopy, esophageal motility study, extravasation           | activity, advice, failure, rate, level                                                                |
| <b>quality of compound term</b> | Its meaning is beyond the simple sum of the meanings of its component words or sub-terms | acute myeloid leukemia, focal necrosis, Cushing's disease, sinus pause, sixth cranial nerve    | acute pancreatitis, alcohol intoxication, head CT, left internal carotid artery, small bowel movement |
| <b>unfamiliarity</b>            | It is unfamiliar to the average person                                                   | neurocytoma, lymphangiomatosis, laryngeal carcinoma, premalignant, hand-foot syndrome          | vitamin, heart disease, tablet, fatigue, infant                                                       |

<sup>a</sup> 7,839 discharge summary notes (5.4 million words) from the University of Pittsburgh Natural Language Processing Repository (Chapman W. University of Pittsburgh Natural Language Processing Repository. Using this data requires a license) [1].

Except unithood which is a general criterion for lexical entry selection, the other three criteria all measure term importance from the perspective of patient EHR comprehension. Specifically, termhood measures whether a term has a clear clinical meaning in its standalone form. Clinical terms are often used to describe patients' medical conditions, diagnostic procedures, and treatments in EHRs, and are therefore important for patients to know to comprehend their EHR notes. Term unfamiliarity measures whether a term is unfamiliar to an average person. Defining

familiar terms will not help patients much with their EHR comprehension because they are already known by the average patient. The quality of a compound term affects its importance in two ways. First, high-quality compound medical terms (e.g., “community-acquired pneumonia”) should be annotated with lay definitions because otherwise patients would not understand them even if they know all the individual words contained in these terms. Second, creating lay definitions for low-quality compound terms is unnecessary if we have defined the individual words in these terms. By excluding low-quality compound terms, we can speed up the annotation process to define more terms important for patient EHR comprehension within a designated time frame.

References:

1. Mowery D, Wiebe J, Visweswaran S, Harkema H, Chapman WW. Building an automated SOAP classifier for emergency department reports. *J Biomed Inform* 2012 Feb;45(1):71–81. PMID:21925286
