# Supplementary material for: A Natural Language Processing System That Links Medical Terms in Electronic Health Record Notes to Lay Definitions: System Development Using Physician Reviews
Source: PubMed Central journal article supplement (PMC5799720; doi:10.2196/jmir.8669), 2018-01-22
Supplement: jmir_v20i1e26_app5.pdf [file jmir_v20i1e26_app5.pdf]

## Multimedia Appendix 5. Lay definitions output by NoteAid for medical terms in an electronic health record note excerpt

Figure A5-1. A snapshot of system output.

**Simplified sample text with CoDeMed (Common Definition in Medicine) definitions**

Cardiac - The patient was hypotensive yesterday during the day with pressures running in the systolics of 80 ' s to 90 ' s by cuff. Cardiology was called to see the patient and they did a quick bedside echocardiogram that revealed no pericardial effusion. Her troponins never went higher than 0.77 and cardiology was not concerned with any primary cardiac event. Her heart rate was also in the one teens to one

The definition will show up when moving the cursor to the medical terms highlighted by hyperlinks.

Protein needed for muscle contraction. It is released into the blood when there is heart damage.

Table A5-1. Lay definitions output by NoteAid for medical terms in the electronic health record excerpt in Figure A5-1.

| Medical term         | Lay Definition                                                                                                         |
|----------------------|------------------------------------------------------------------------------------------------------------------------|
| cardiac              | Having to do with the heart.                                                                                           |
| hypotensive          | Having low blood pressure.                                                                                             |
| systolics            | The top number in a blood pressure reading. It refers to the pressure in the arteries during heart muscle contraction. |
| cardiology           | Medical field that treats heart problems.                                                                              |
| echocardiogram       | Picture of the heart using sound waves (ultrasound).                                                                   |
| pericardial effusion | A condition in which extra fluid collects between the heart and the sac around the heart.                              |
| troponins            | Protein needed for muscle contraction. It is released into the blood when there is heart damage.                       |
| cardiac event        | [[cardiac]]: having to do with the heart.                                                                              |
