# Supplementary material for: A Natural Language Processing System That Links Medical Terms in Electronic Health Record Notes to Lay Definitions: System Development Using Physician Reviews
Source: PubMed Central journal article supplement (PMC5799720; doi:10.2196/jmir.8669), 2018-01-22
Supplement: jmir_v20i1e26_app6.pdf [file jmir_v20i1e26_app6.pdf]

## Multimedia Appendix 6. User interfaces of the original NoteAid system used in this study and the system with post-evaluation enhancements

Figure A6-1. Comparison of user interfaces of the original NoteAid system and the enhanced system when they are processing the input text

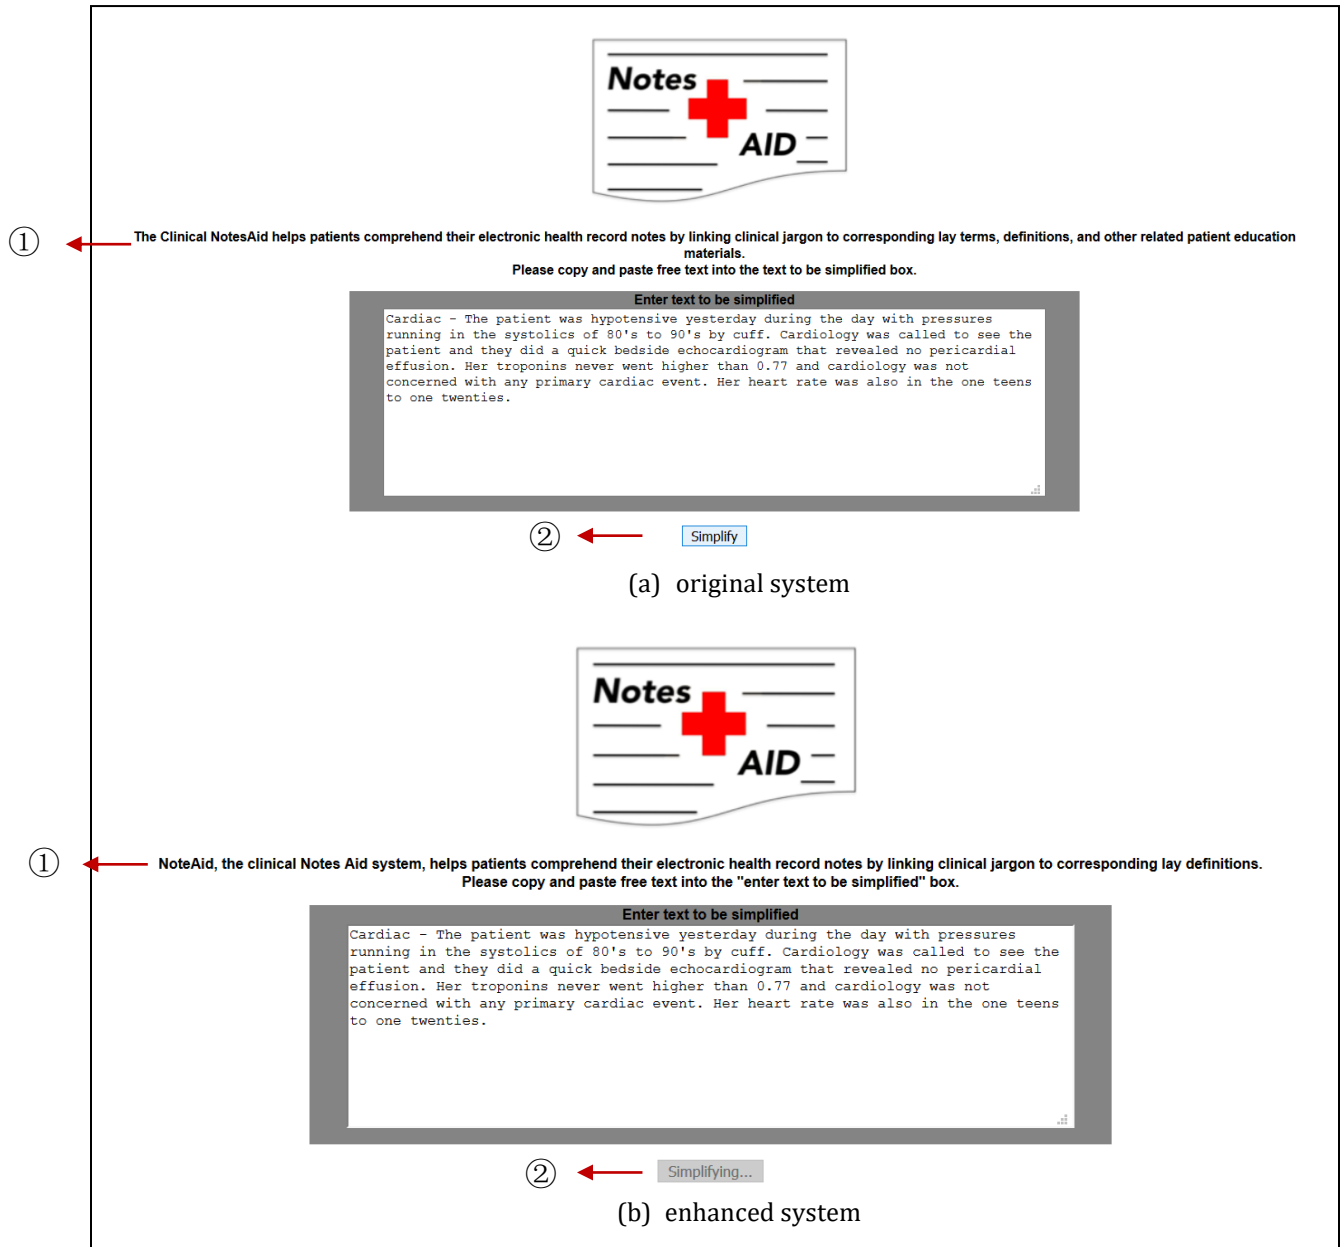

Notes:

- ① The new system improved clarify of the introduction text for the NoteAid system
- ② The new system disables and greys out the "simplify" button when the system starts to process the input text and re-enables it after the processing completes

Figure A6-2. Comparison of the original NoteAid system and the enhanced system in displaying system output



The Clinical NotesAid helps patients comprehend their electronic health record notes by linking clinical jargon to corresponding lay terms, definitions, and other related patient education materials.

① Please copy and paste free text into the search box.

Here is some sample text

Cardiac - The patient was hypotensive yesterday during the day with pressures running in the systolics of 80's to 90's by cuff. Cardiology was called to see the patient and they did a quick bedside echocardiogram that revealed no pericardial effusion. Her troponins never went higher than 0.77 and cardiology was not concerned with any primary cardiac event. Her heart rate was also in the one teens to one twenties.

Simplified sample text with CoDeMed (Common Definition in Medicine) definitions

[Cardiac](#) - The patient was [hypotensive](#) yesterday during the day with pressures running in the [systolics](#) of 80 ' s to 90 ' s by cuff. [Cardiology](#) was called to see the patient and they did a quick bedside [echocardiogram](#) that revealed no [pericardial effusion](#). Her [troponins](#) never went higher than 0.77 and [cardiology](#) was not concerned with any primary [cardiac event](#). Her heart rate was also in the one teens to one twenties.

②

(a) original system



NoteAid, the clinical Notes Aid system, helps patients comprehend their electronic health record notes by linking clinical jargon to corresponding lay definitions.

① Please copy and paste free text into the search box.

Enter text to be simplified

Cardiac - The patient was hypotensive yesterday during the day with pressures running in the systolics of 80's to 90's by cuff. Cardiology was called to see the patient and they did a quick bedside echocardiogram that revealed no pericardial effusion. Her troponins never went higher than 0.77 and cardiology was not concerned with any primary cardiac event. Her heart rate was also in the one teens to one twenties.

Simplified sample text with CoDeMed (Common Definition in Medicine) definitions

[Cardiac](#) - The patient was [hypotensive](#) yesterday during the day with pressures running in the [systolics](#) of 80 ' s to 90 ' s by cuff. [Cardiology](#) was called to see the patient and they did a quick bedside [echocardiogram](#) that revealed no [pericardial effusion](#). Her [troponins](#) never went higher than 0.77 and [cardiology](#) was not concerned with any primary [cardiac event](#). Her heart rate was also in the one teens to one twenties.

②

(b) enhanced system

Notes:

- ① The new system improved clarify of the input box label
- ② The new system keeps the simplify button right below the input box
